# Supplementary material
Source: PubMed Central journal article supplement (PMC5009006)
Supplement: NIHMS785667-supplement-1.pdf [file NIHMS785667-supplement-1.pdf]

SUPPLEMENTARY INFORMATION

**Reduction of GPSM3 expression akin to the arthritis-protective SNP rs204989 differentially affects migration in a neutrophil model**

BJ Gall<sup>1</sup>, AB Schroer<sup>1</sup>, JD Gross<sup>1</sup>, V Setola<sup>1,2</sup>, DP Siderovski<sup>1</sup>

<sup>1</sup>Department of Physiology & Pharmacology and

<sup>2</sup>Department of Behavioral Medicine & Psychiatry,

West Virginia University School of Medicine, Morgantown, WV, USA 26506-9229

**Table S1:** Counts of formazan-positive/-intermediate/-negative cells (out of 500 cells counted per condition; analysed in triplicate per experiment; n = 2 experiments) enumerated for the creation of Figure 2B's bar graphs.

| Vehicle treated |                   |     |     |     |     |     |                       |    |    |    |    |    |                   |     |     |     |     |     |
|-----------------|-------------------|-----|-----|-----|-----|-----|-----------------------|----|----|----|----|----|-------------------|-----|-----|-----|-----|-----|
| NB4 line:       | Formazan-Positive |     |     |     |     |     | Formazan-Intermediate |    |    |    |    |    | Formazan-Negative |     |     |     |     |     |
| shRNA19.1       | 3                 | 2   | 0   | 2   | 1   | 2   | 6                     | 9  | 8  | 5  | 7  | 8  | 491               | 489 | 492 | 493 | 492 | 490 |
| shRNA19.5       | 2                 | 1   | 0   | 1   | 0   | 1   | 9                     | 6  | 9  | 4  | 7  | 9  | 489               | 493 | 491 | 495 | 493 | 490 |
| shRNA20.2       | 0                 | 1   | 1   | 0   | 0   | 0   | 7                     | 5  | 6  | 11 | 8  | 10 | 493               | 494 | 493 | 489 | 492 | 490 |
| shRNA20.5       | 1                 | 1   | 3   | 3   | 0   | 1   | 9                     | 8  | 9  | 8  | 7  | 7  | 490               | 491 | 488 | 489 | 493 | 492 |
| scrambled 2     | 3                 | 0   | 0   | 2   | 1   | 0   | 5                     | 6  | 8  | 8  | 10 | 6  | 492               | 494 | 490 | 490 | 489 | 494 |
| scrambled 3     | 2                 | 0   | 0   | 3   | 1   | 0   | 8                     | 10 | 7  | 6  | 7  | 9  | 490               | 490 | 493 | 491 | 492 | 491 |
|                 |                   |     |     |     |     |     |                       |    |    |    |    |    |                   |     |     |     |     |     |
| ATRA treated    |                   |     |     |     |     |     |                       |    |    |    |    |    |                   |     |     |     |     |     |
| NB4* line:      | Formazan-Positive |     |     |     |     |     | Formazan-Intermediate |    |    |    |    |    | Formazan-Negative |     |     |     |     |     |
| shRNA19.1       | 447               | 448 | 438 | 451 | 457 | 447 | 48                    | 40 | 53 | 35 | 39 | 46 | 5                 | 12  | 9   | 14  | 4   | 7   |
| shRNA19.5       | 462               | 455 | 463 | 454 | 453 | 450 | 31                    | 36 | 32 | 38 | 37 | 48 | 7                 | 9   | 5   | 8   | 10  | 2   |
| shRNA20.2       | 451               | 453 | 455 | 461 | 466 | 462 | 40                    | 41 | 34 | 31 | 26 | 31 | 9                 | 6   | 11  | 8   | 8   | 7   |
| shRNA20.5       | 465               | 460 | 459 | 451 | 451 | 464 | 30                    | 28 | 32 | 40 | 41 | 30 | 5                 | 12  | 9   | 9   | 8   | 6   |
| scrambled 2     | 461               | 465 | 450 | 462 | 452 | 459 | 31                    | 28 | 39 | 32 | 39 | 31 | 8                 | 7   | 11  | 6   | 9   | 10  |
| scrambled 3     | 452               | 463 | 460 | 454 | 458 | 450 | 40                    | 31 | 31 | 34 | 35 | 40 | 8                 | 6   | 9   | 12  | 7   | 10  |

**Table S2:** Sequences of shRNA hairpins used in this study.

| shRNA | Sequence (5'>3')                                 | Target Region |
|-------|--------------------------------------------------|---------------|
| 19    | GCGAGATGGAACAGGGATTTACTCGAGTAAATCCCTGTTCCATCTCGC | 3' UTR        |
| 20    | AGAACAGCTTTACAGCACTATCTCGAGATAGTGCTGTAAGCTGTTCT  | CDS           |
| 22    | CCACCACTCGGCCTTGCGATCTCGAGATCGCCAAGGCCGAGTGGTGG  | CDS           |
| Scr   | CCTAAGGTTAAGTCGCCCTCGCTCGAGCGAGGGCGACTTAACCTTAGG | N/A           |

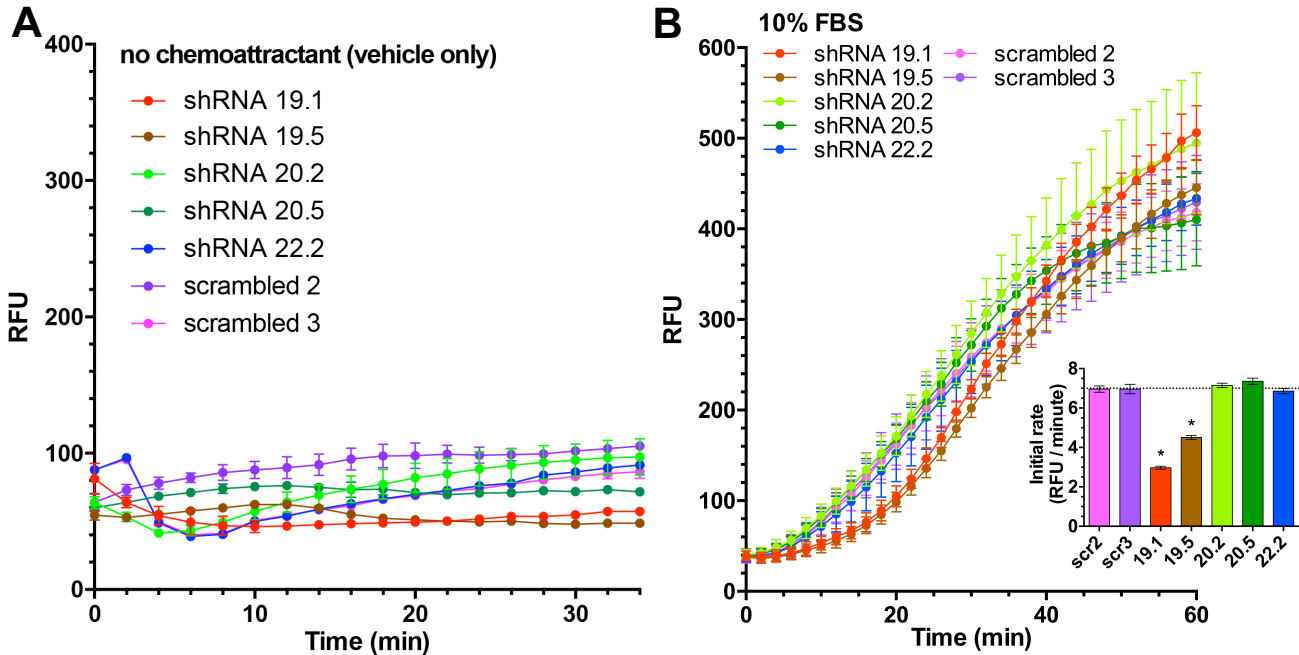

**Figure S1.** GPSM3 deficiency has no effect on NB4\* cell migration in the absence of chemoattractant in the lower chamber (panel A) and only a minimal effect in initial rate of migration towards 10% fetal bovine serum (panel B & inset). Real-time Transwell migration measured by fluorescence of migrated cells (RFU, relative fluorescence units) towards indicated lower-chamber contents by indicated NB4\* cell lines (after an initial 120 hours of ATRA differentiation). Inset bar-graph of initial rates: \*,  $p < 0.05$  vs scrambled controls.

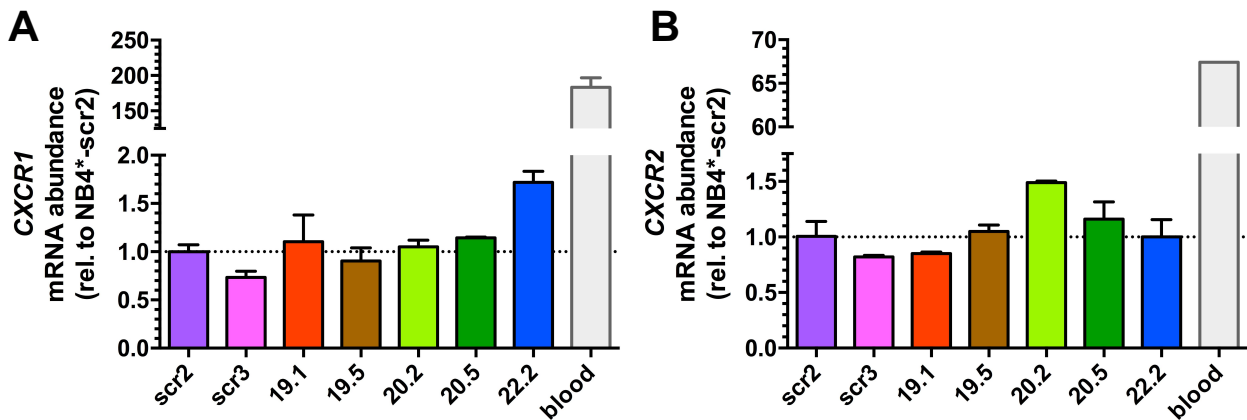

**Figure S2.** GPSM3 deficiency has negligible effects on the mRNA expression levels of CXCL8 receptors CXCR1 (panel A) and CXCR2 (panel B). Post-differentiated NB4\* cell line abundance of CXCR1 and CXCR2 mRNAs was measured by qRT-PCR and normalized to the scrambled 2 line; significance ( $p < 0.05$ ) determined by Kruskal-Wallis test (unequal group variances, Brown-Forsythe  $p < 0.05$ ) with Dunn's post-hoc. All data plotted as mean  $\pm$  S.E.M. "blood", mRNA level measured from total RNA of human whole blood.

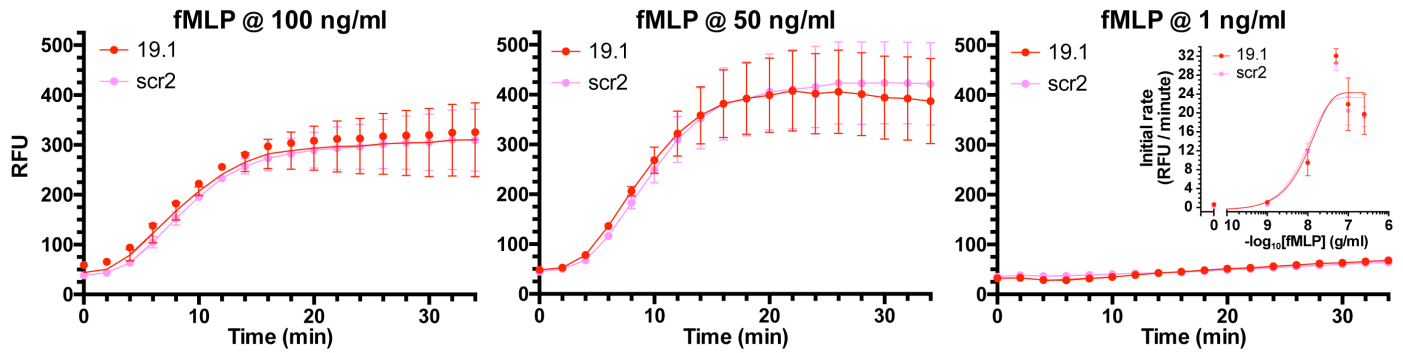

**Figure S3. Dose-response analysis confirming that GPSM3 deficiency has no effect on NB4\* cell migration toward fMLP.** Real-time Transwell migration towards indicated concentrations of fMLP over 34 minutes by indicated NB4\* cell lines (after 120 hours of ATRA differentiation).

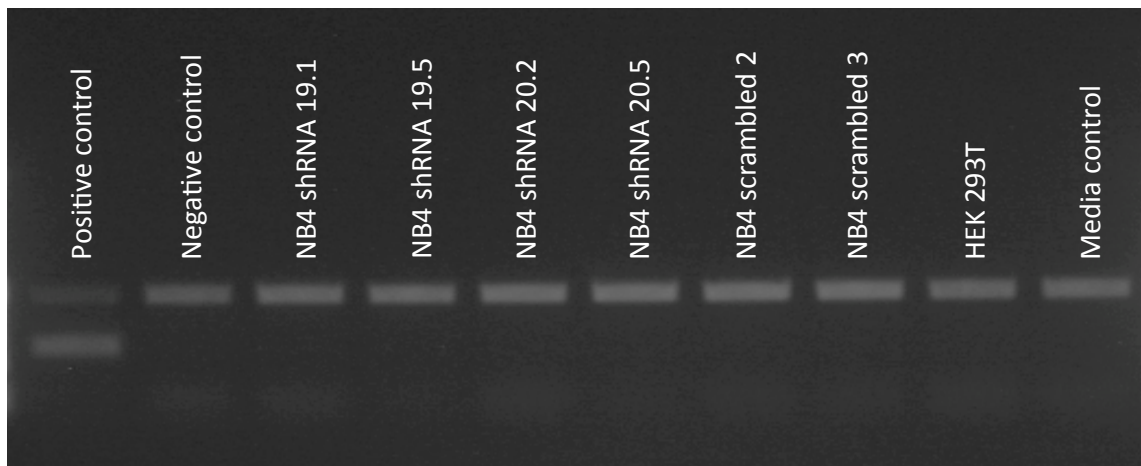

**Figure S4. PCR confirmation of lack of *Mycoplasma spp.* and *Acholeplasma spp.* contamination.** PCR amplification of highly conserved 16S rRNA coding region (lower band) and internal control DNA (upper band) was performed using Lookout® Mycoplasma PCR Detection Kit (Sigma-Aldrich, St. Louis, MO), which is sensitive to 10 genomes per 1  $\mu$ l. Performed by directly adhering to the manufacturer's instructions. Lane 1: (Positive control) PCR amplification of both the internal control (upper band) and *Mycoplasma orale* DNA fragments (lower band). Lane 2: (Negative control) PCR amplification of only the internal control. Lanes 3-9: (Culture supernatants) PCR amplification of only the internal control, including HEK 293T cells previously tested to be free of *Mycoplasma spp.* contamination. Lane 10: (Media control) PCR amplification only the internal control from fresh media.
